# Supplementary material
Source: publisher figshare collection journal article supplement (https://acs.figshare.com/ndownloader/files/26843613)
Supplement: Supplementary file 1 [file 26843613]

## Supporting Information

# Intermixed $\text{WS}_2+\text{MoS}_2$ Nanodisks/Graphene van der Waals Heterostructures for Surface-Enhanced Raman Spectroscopy Sensing

*Samar Ali Ghopry<sup>1, 2\*</sup>, Seyed M. Sadeghi<sup>3</sup>, Yasmine Farhat<sup>4</sup>, Cindy L. Berrie<sup>4</sup>, Mohammed Alamri<sup>1,5</sup>, and Judy Z. Wu<sup>1, \*</sup>*

<sup>1</sup>Department of Physics and Astronomy, The University of Kansas, Lawrence, Kansas, 66045, United States

<sup>2</sup>Department of Physics, Jazan University, Jazan 45142, Saudi Arabia.

<sup>3</sup>Department of Physics, The University of Alabama in Huntsville, Alabama, 35899, United States

<sup>4</sup>Department of Chemistry, The University of Kansas, Lawrence, Kansas 66045, United States

<sup>5</sup>Department of Physics, University of Umm Al-Qura, P.O. Box 56335, Makkah 21955, Saudi Arabia

\*Corresponding Authors.

Email:s461g593@ku.edu (Samar Ghopry)

Email:jwu@ku.edu (Judy Wu)

**Figure S1** shows the Raman map of three samples (a)  $\text{MoS}_2$  of  $\text{MoS}_2\text{NDS/graphene}$ , (b)  $\text{MoS}_2$  of  $\text{MoS}_2\text{NDs}+\text{MoS}_2\text{NDS/graphene}$  sample, and (c) Raman maps of  $\text{MoS}_2\text{NDs}$  and  $\text{WS}_2\text{NDs}$  ( $A_{1g}$  mode) of  $\text{WS}_2\text{NDs}+\text{MoS}_2\text{NDS/graphene}$  sample. (d) shows Raman spectra of R6G molecules at the concentration of  $5 \times 10^{-5}\text{M}$  deposited on the three samples (e) The ratio (R) of the  $613\text{ cm}^{-1}$  R6G peak intensity of the SERS substrates of  $\text{MoS}_2/\text{G}$ ,  $\text{MoS}_2\text{NDs}+\text{MoS}_2\text{NDs/graphene}$  and  $\text{WS}_2\text{NDs}+\text{MoS}_2\text{NDs/graphene}$  to the same peak on  $\text{MoS}_2/\text{G}$ .

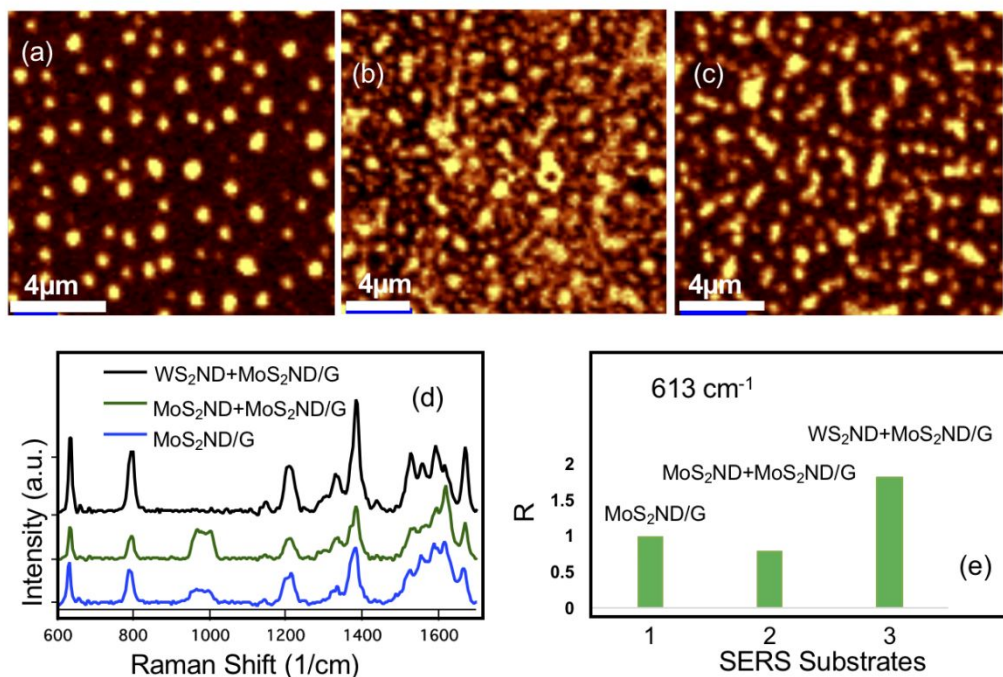

**Figure S1.** (a) A representative Raman map of MoS<sub>2</sub> ( $A_{1g}$  mode) of MoS<sub>2</sub>NDS/graphene, (b) A representative Raman map of MoS<sub>2</sub> ( $A_{1g}$  mode) of MoS<sub>2</sub>NDS+MoS<sub>2</sub>NDS/graphene sample, (c) Raman maps of MoS<sub>2</sub>NDS and WS<sub>2</sub>NDS ( $A_{1g}$  mode) of WS<sub>2</sub>NDS+MoS<sub>2</sub>NDS/graphene sample. (d) Raman spectra of R6G molecules at the concentration of  $5 \times 10^{-5}$  M deposited on WS<sub>2</sub>NDS+MoS<sub>2</sub> NDS/graphene (black), MoS<sub>2</sub>NDS+MoS<sub>2</sub> NDS/graphene (green), and MoS<sub>2</sub>NDS/graphene (blue) heterostructures substrates. (e) The ratio (R) of the 613  $\text{cm}^{-1}$  R6G peak intensity of the SERS substrates of MoS<sub>2</sub>/G to the same peak on MoS<sub>2</sub>/G (column 1), MoS<sub>2</sub>NDS+MoS<sub>2</sub>NDS/graphene (Column 2), and WS<sub>2</sub> NDS+MoS<sub>2</sub>NDS/graphene (Column 3).
